# Supplementary material for: Role of suppressed oxygen vacancies in the BiFeO3 nanofiller to improve the polar phase and multifunctional performance of poly(vinylidene fluoride)
Source: Royal Society of Chemistry journal article supplement (doi:10.1039/c8cp07281g), 2019-01-01
Supplement: c8cp07281g1.pdf [file c8cp07281g1.pdf]

**ELECTRONIC SUPPLEMENTARY INFORMATION (ESI)**

**Title of Article: Role of Suppressed Oxygen Vacancy in BiFeO<sub>3</sub> Nanofiller to Improve the Polar Phase and Multifunctional Performance of Poly(vinylidene fluoride)**

Abhishek Sasmal, Shrabanee Sen\*, P. Sujatha Devi

Functional Materials and Devices Division, CSIR-Central Glass & Ceramic Research

Institute, Kolkata-700032, India

[\\*shrabanee@cgcri.res.in](mailto:*shrabanee@cgcri.res.in)

## ELECTRONIC SUPPLEMENTARY INFORMATIONS

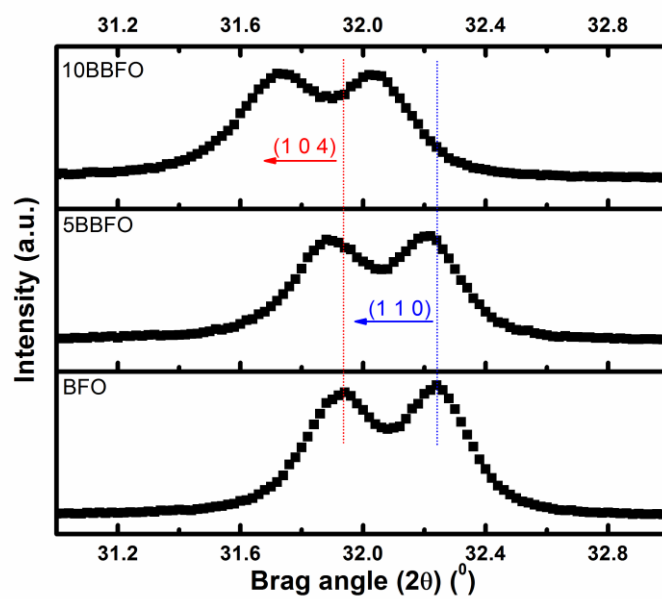

**Fig. S1** Enlarged XRD of BFO, 5BBFO and 10BBFO around  $2\theta=32^\circ$ .

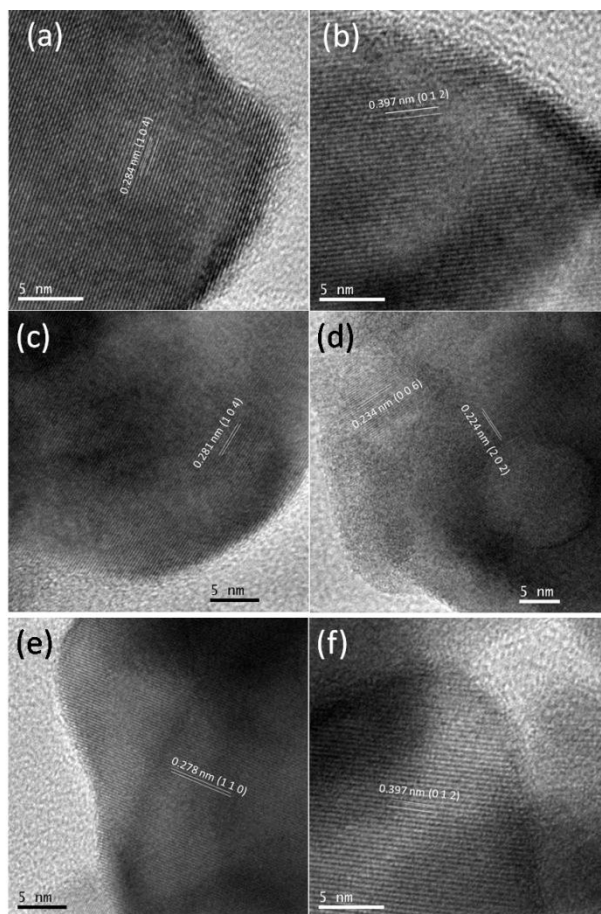

**Fig. S2** HRTEM images of (a-b) BFO, (c-d) 5BBFO and (e-f) 10BBFO samples.

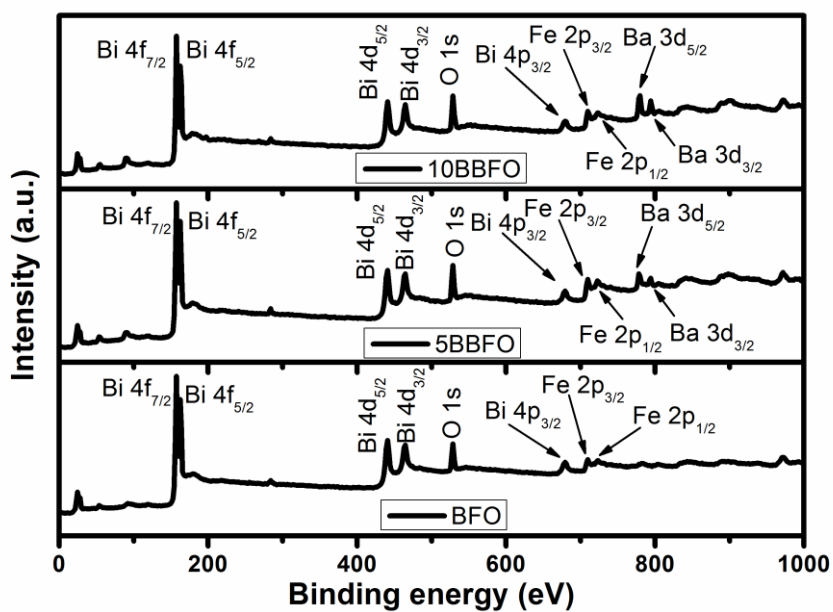

Fig. S3 XPS survey spectra of BFO, 5BBFO and 10BBFO samples.

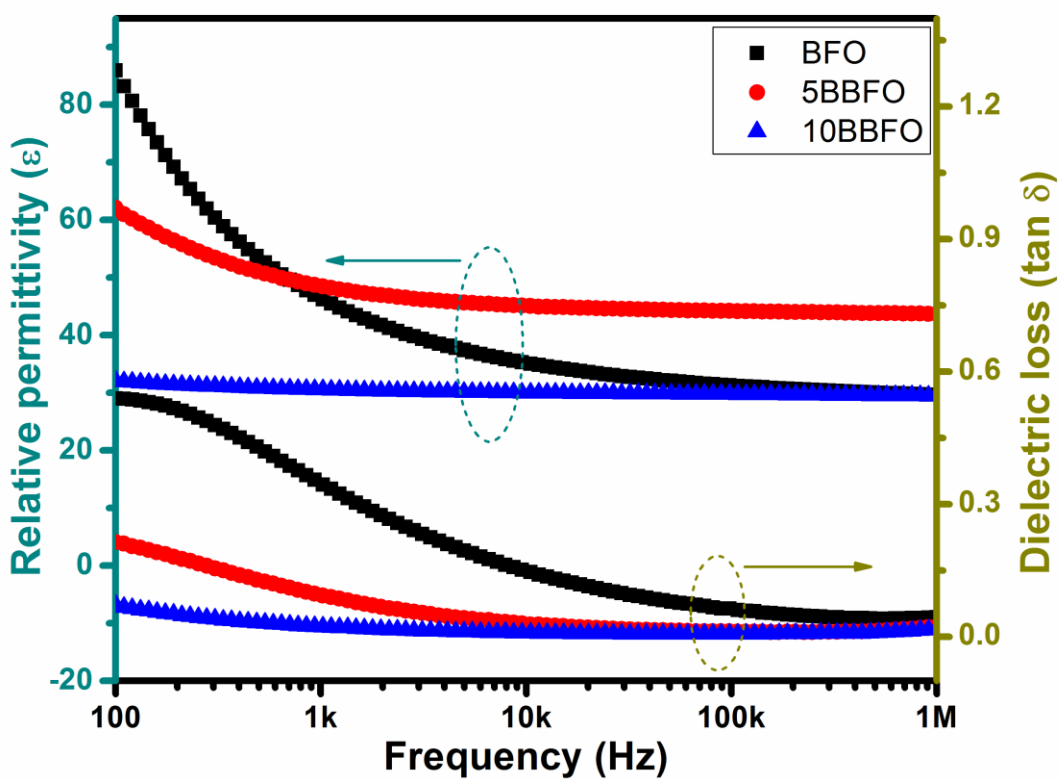

Fig. S4 Frequency dependent dielectric loss and dielectric permittivity of BFO, 5BBFO and 10BBFO pellets.

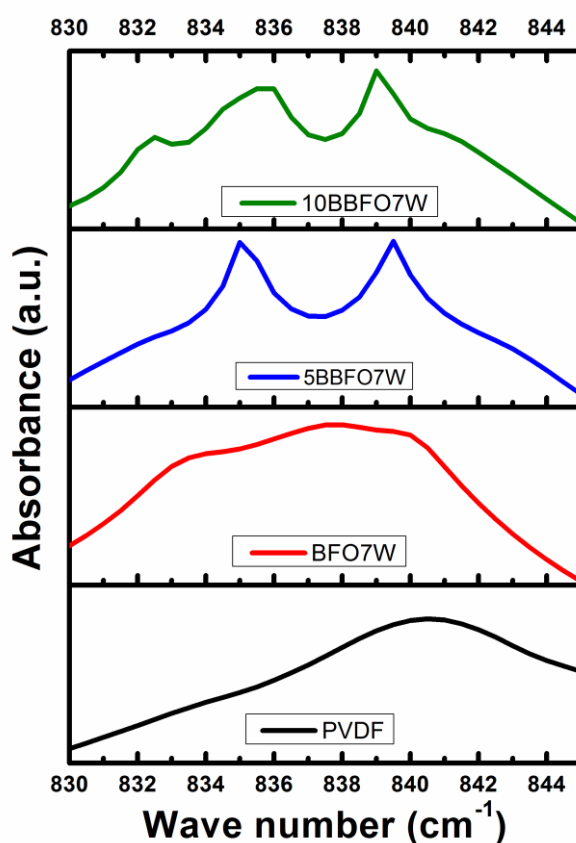

**Fig. S5** FTIR absorption spectra of PVDF, BFO7W, 5BBFO7W and 10BBFO7W films within the range of  $830 \text{ cm}^{-1}$  to  $840 \text{ cm}^{-1}$ .

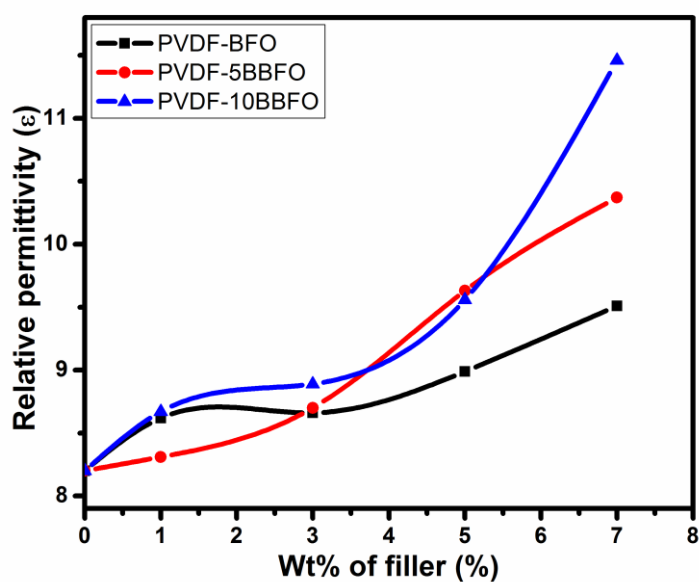

**Fig. S6** Variation of relative permittivity with wt% of BFO, 5BBFO and 10BBFO nanofillers.

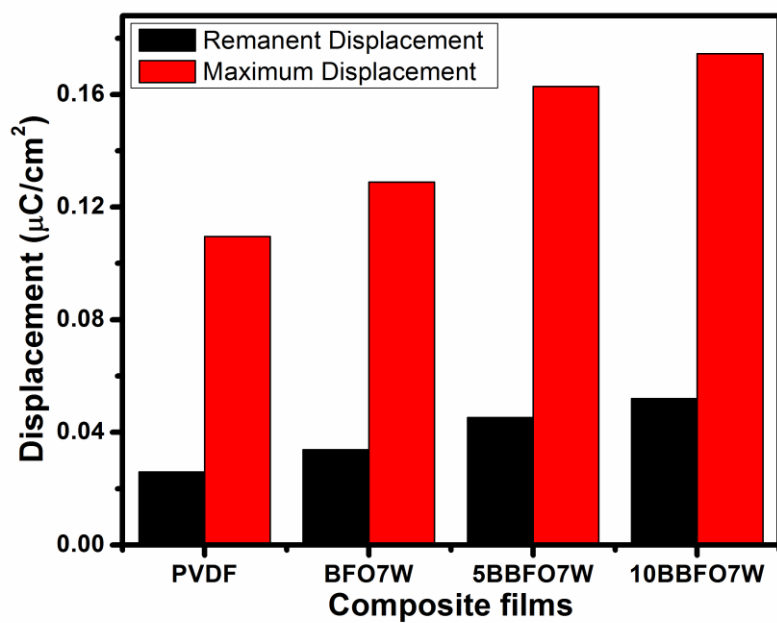

Fig. S7 Remanent and Maximum electric displacement of different composite films.

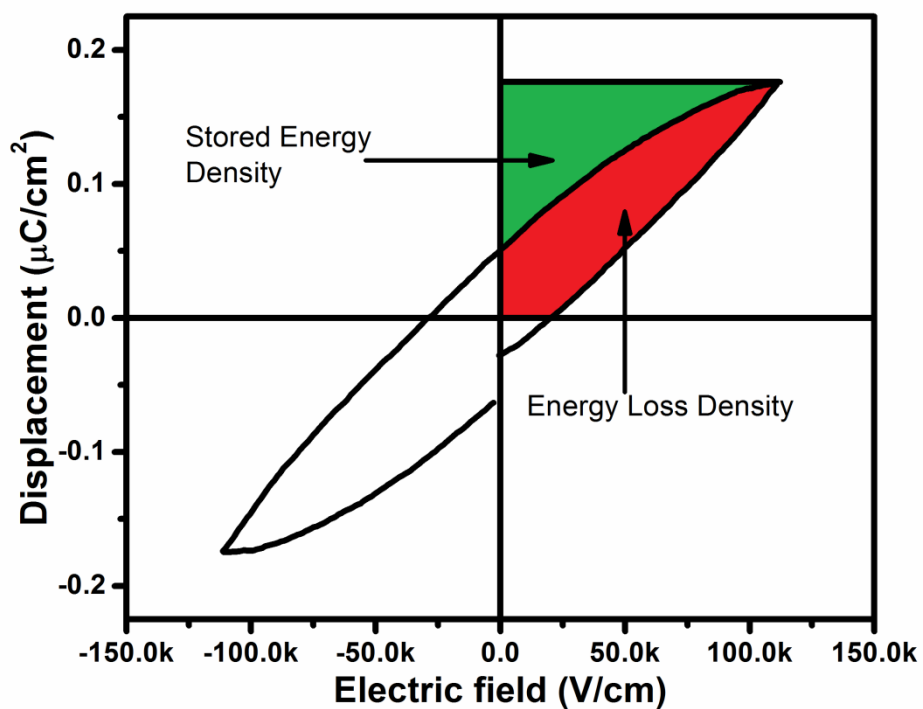

Fig. S8 D-E hysteresis loop showing the areas representing stored energy density and energy loss density.

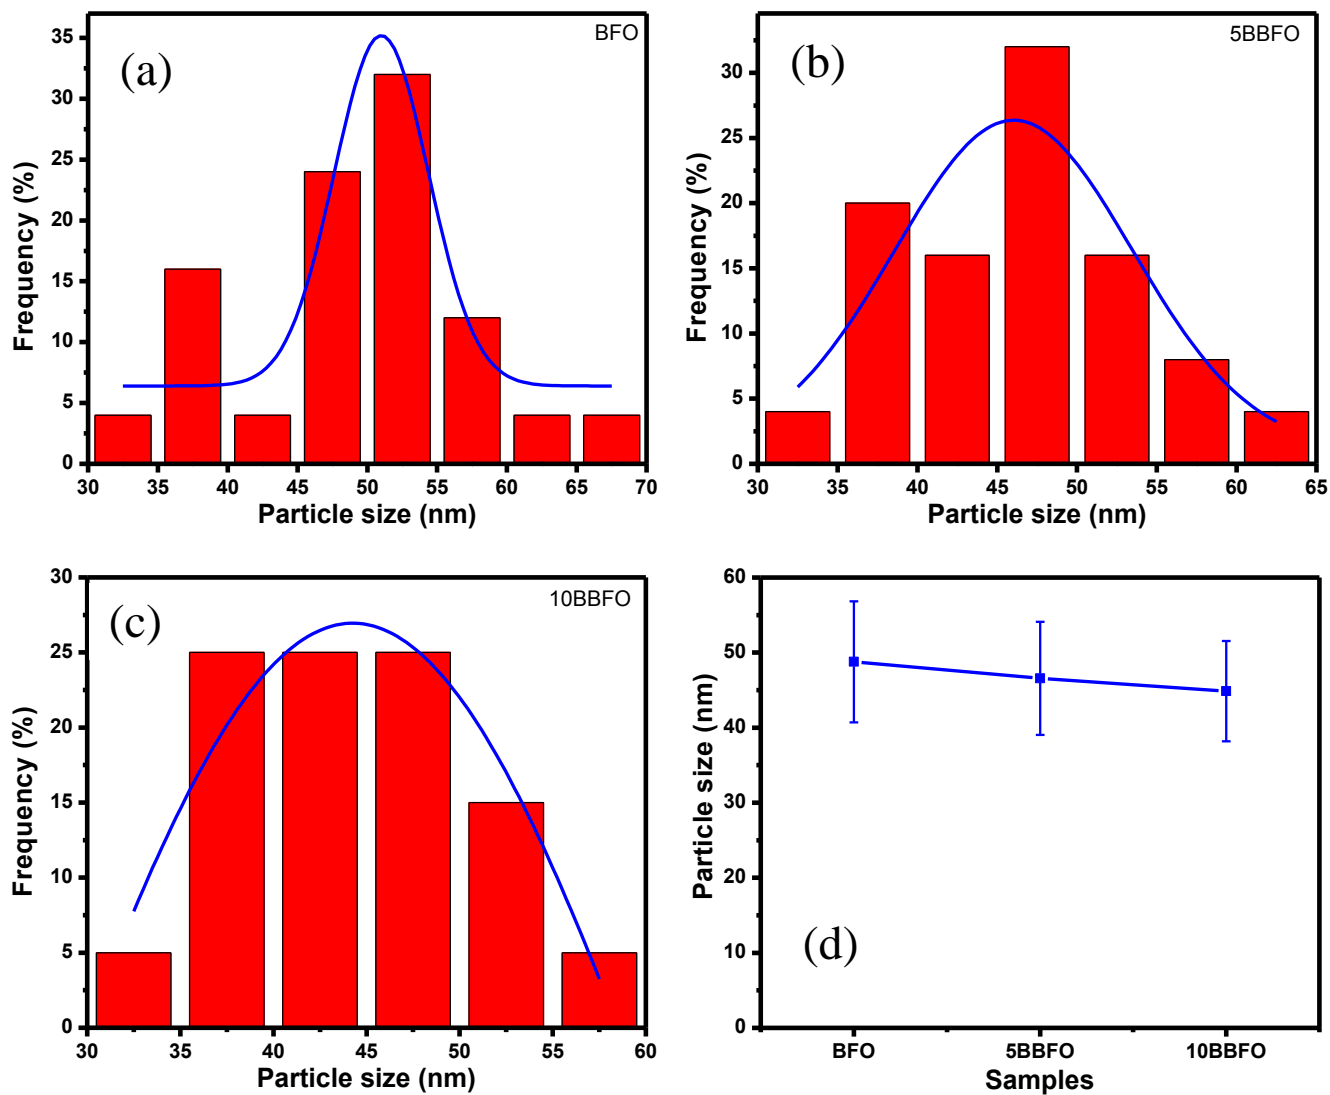

**Fig. S9** Particle size distribution of (a) BFO, (b) 5BBFO and (c) 10BBFO nanoparticles. (d) Average particle size of these samples with standard deviation.

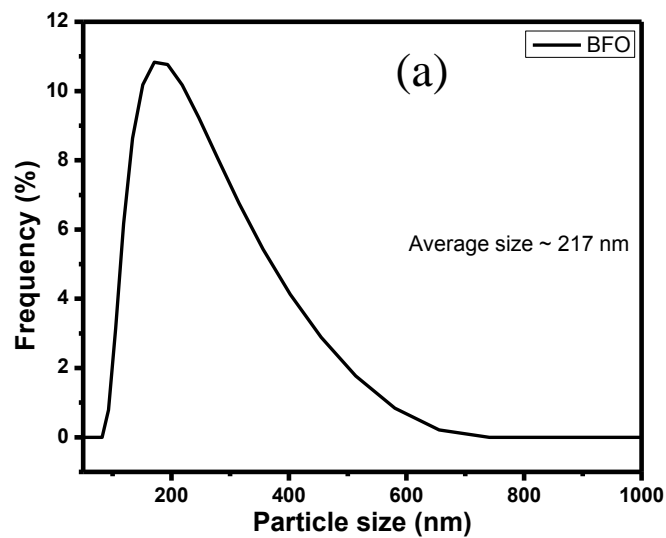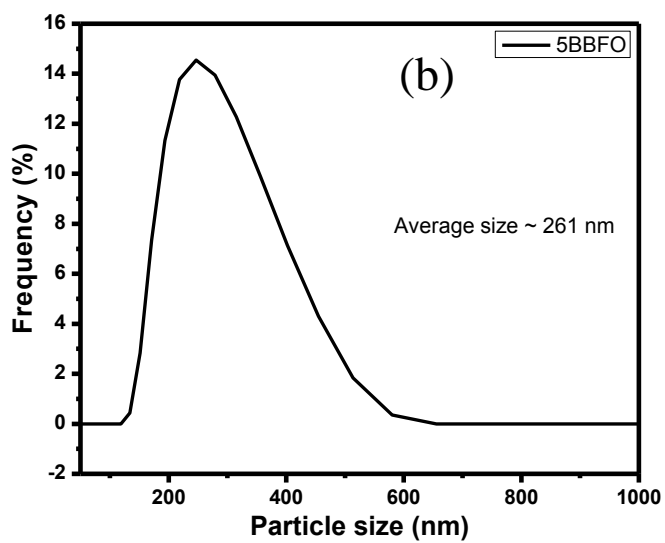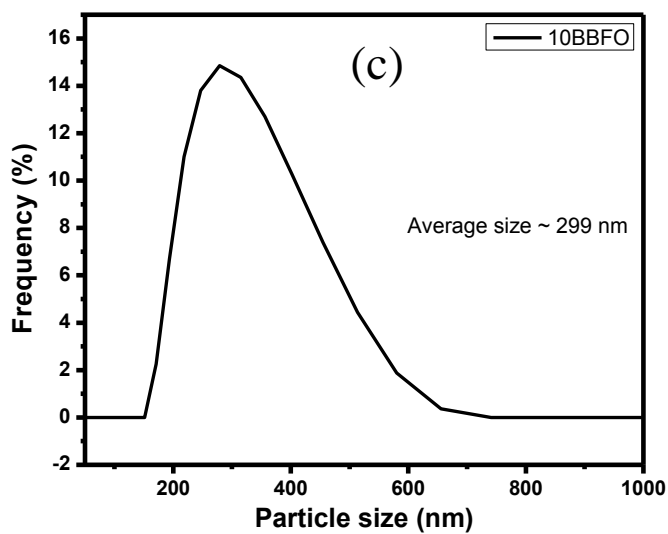

**Fig. S10** Particle size of (a) BFO, (b) 5BBFO and (c) 10BBFO nanoparticles as obtained from DLS measurement.

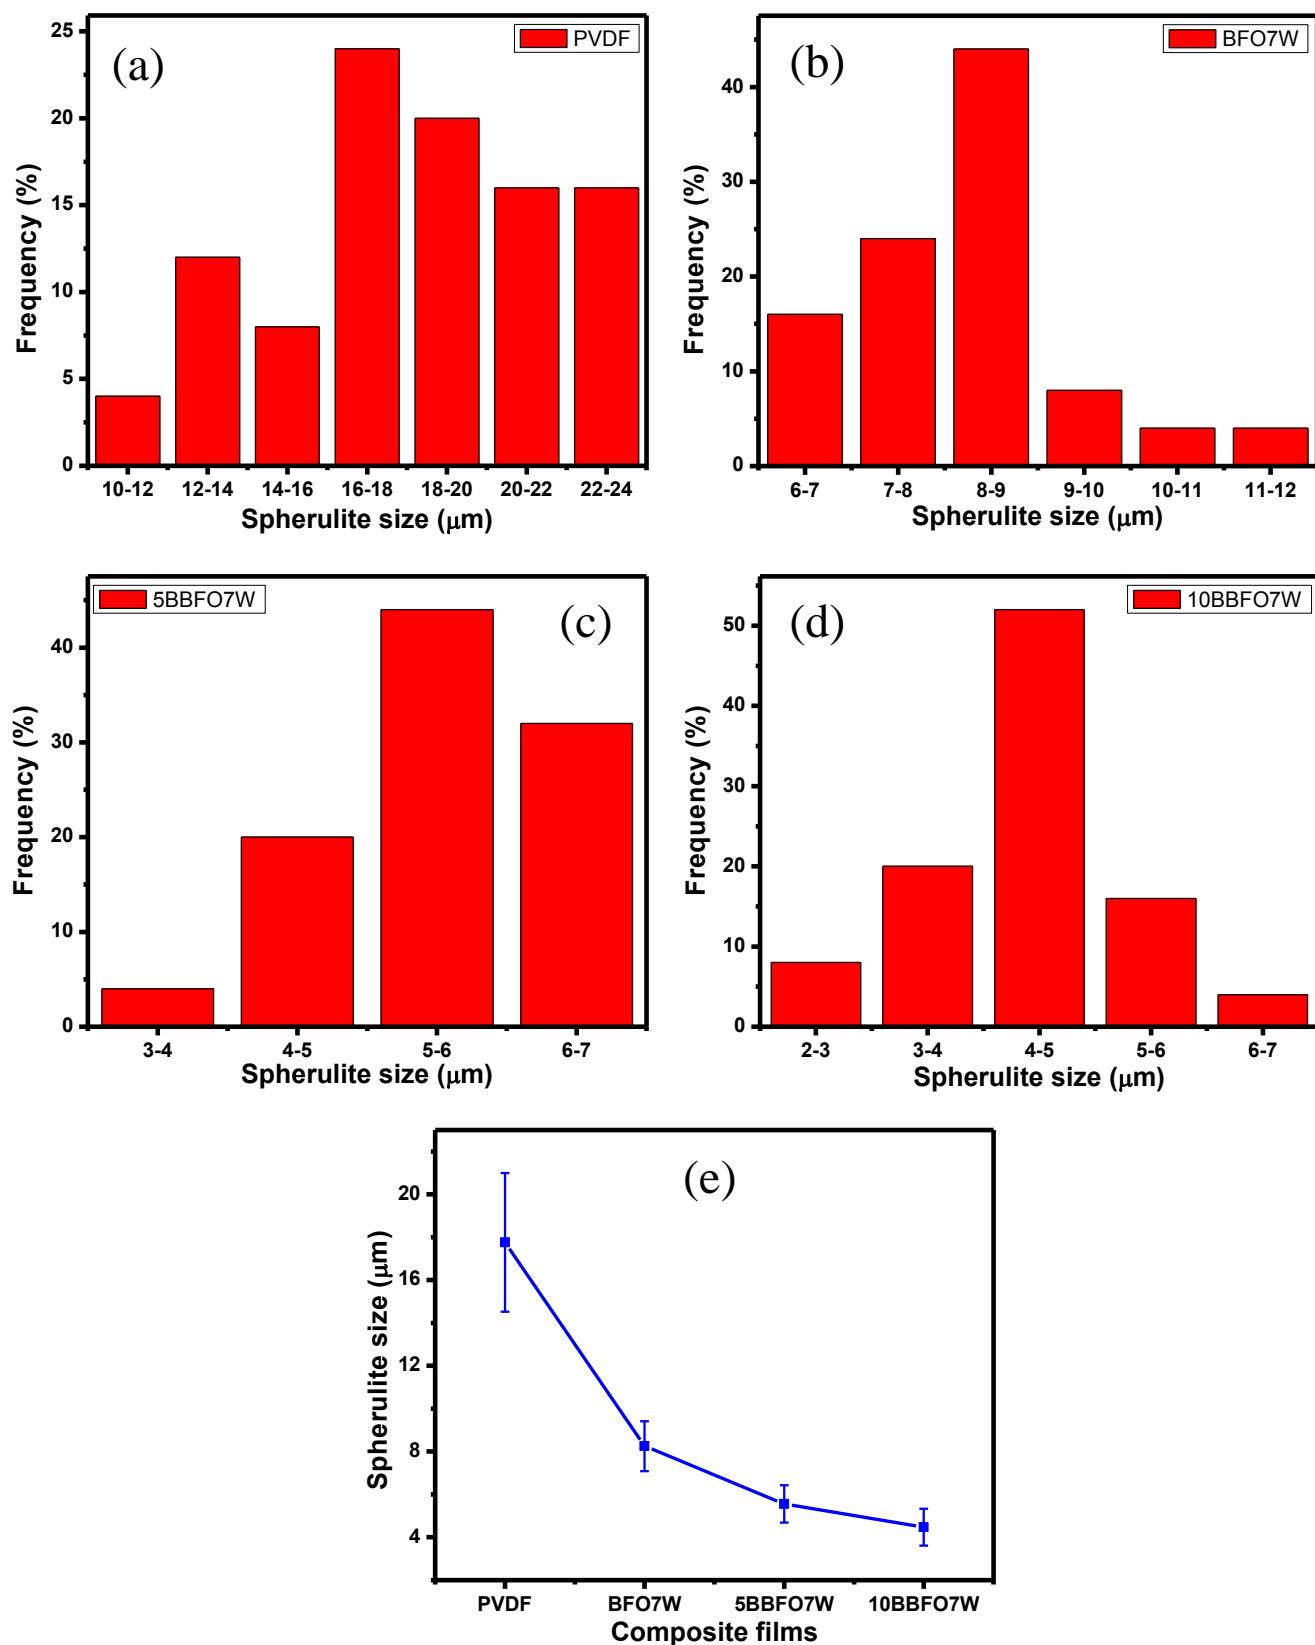

**Fig. S11** Spherulite size distribution of (a) PVDF, (b) BFO7W, (c) 5BBFO7W and (d) 10BBFO7W films. (e) Average spherulite size with standard deviation.



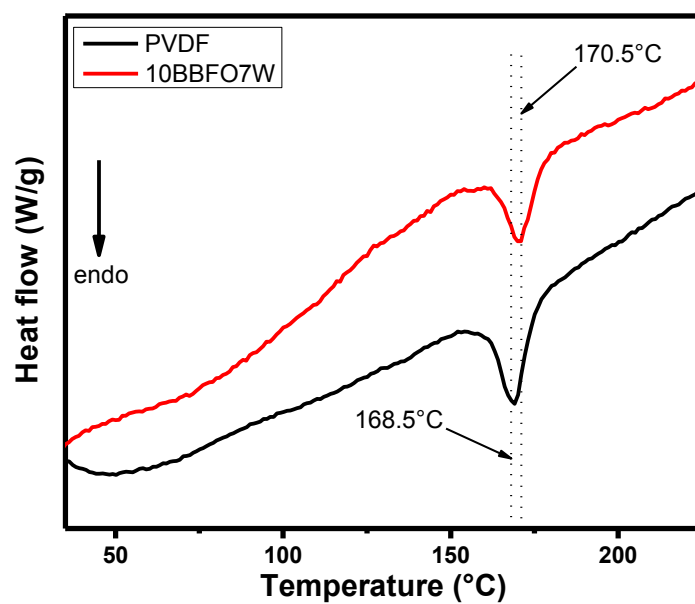

**Fig. S12** DSC curves of neat PVDF and 10BBFO7W sample.

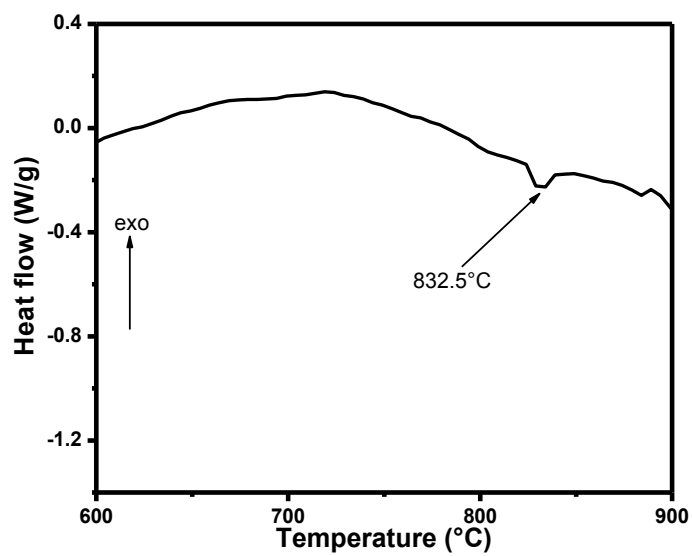

**Fig. S13** DSC curve of 10BBFO nanoparticles.
